# Supplementary material for: Describing the Process of Adopting Nutrition and Fitness Apps: Behavior Stage Model Approach
Source: PubMed Central journal article supplement (PMC5871740; doi:10.2196/mhealth.8261), 2018-03-13
Supplement: mhealth_v6i3e55_app2.pdf [file mhealth_v6i3e55_app2.pdf]

## Supplementary File: Results

**Table 1**

Descriptive statistics of sociodemographic and behavioral correlates of fitness app adoption.

|                              | Gender <sup>1</sup> |            | Age           | Years of education | BMI           | Healthy eating style |
|------------------------------|---------------------|------------|---------------|--------------------|---------------|----------------------|
|                              | Female              | Male       | <i>M (SD)</i> | <i>M (SD)</i>      | <i>M (SD)</i> | <i>M (SD)</i>        |
| Stage 1 'unengaged'          | 253 (1.1)           | 130 (-1.1) | 47.18 (17.00) | 15.86 (2.39)       | 24.15 (3.46)  | 4.47 (0.93)          |
| Stage 2 'decided to act'     | 69 (1.4)            | 29 (-1.4)  | 37.34 (15.68) | 15.60 (2.52)       | 23.62 (3.11)  | 4.20 (0.88)          |
| Stage 3 'decided not to act' | 155 (0.9)           | 78 (-0.9)  | 37.51 (16.28) | 16.21 (2.39)       | 23.93 (3.93)  | 4.30 (0.88)          |
| Stage 4 'acting'             | 151 (-2.8)          | 115 (2.8)  | 34.96 (14.12) | 15.73 (2.40)       | 24.27 (3.41)  | 4.23 (0.85)          |
| Stage 5 'disengaged'         | 101 (-0.3)          | 60 (0.3)   | 34.00 (13.68) | 15.74 (2.39)       | 24.18 (3.99)  | 4.25 (0.84)          |

Note. <sup>1</sup> For gender, the number of participants in the cell and the standardised adjusted residuals (in brackets) are displayed.

**Table 2**

Descriptive statistics of psychological correlates of fitness app adoption.

|                              | Preference for intuition | Preference for deliberation |
|------------------------------|--------------------------|-----------------------------|
|                              | <i>M (SD)</i>            | <i>M (SD)</i>               |
| Stage 1 'unengaged'          | 3.41 (0.84)              | 3.00 (0.98)                 |
| Stage 2 'decided to act'     | 3.32 (0.85)              | 3.32 (0.95)                 |
| Stage 3 'decided not to act' | 3.29 (0.80)              | 3.28 (0.92)                 |
| Stage 4 'acting'             | 3.18 (0.85)              | 3.36 (0.96)                 |
| Stage 5 'disengaged'         | 3.41 (0.80)              | 3.19 (0.92)                 |
