# Supplementary material for: Describing the Process of Adopting Nutrition and Fitness Apps: Behavior Stage Model Approach
Source: JMIR Mhealth Uhealth. 2018 Mar 13;6(3):e55. doi: 10.2196/mhealth.8261 (PMC5871740; doi:10.2196/mhealth.8261)
Supplement: Multimedia Appendix 1 [file mhealth_v6i3e55_app1.pdf]

### Supplementary File: Measures

| Measure used in the<br>current study                                                  | Original measure                                                        | Adaptation                                                                                                                                                                                                                                                                                                                                                                                                                                                                                                                                                                                                                                                                                                                                                                                                                                                                                                                                           | Items (translated)                                                                                                                                                                                                                                                                                                                                                                      |
|---------------------------------------------------------------------------------------|-------------------------------------------------------------------------|------------------------------------------------------------------------------------------------------------------------------------------------------------------------------------------------------------------------------------------------------------------------------------------------------------------------------------------------------------------------------------------------------------------------------------------------------------------------------------------------------------------------------------------------------------------------------------------------------------------------------------------------------------------------------------------------------------------------------------------------------------------------------------------------------------------------------------------------------------------------------------------------------------------------------------------------------|-----------------------------------------------------------------------------------------------------------------------------------------------------------------------------------------------------------------------------------------------------------------------------------------------------------------------------------------------------------------------------------------|
| Stage model for the<br>adoption process of<br>mHealth apps (nutrition<br>and fitness) | Precaution Adoption<br>Process Model<br>(Weinstein &<br>Sandmann, 1992) | <p>The adaptation is based on the Stage Model of Health-related Awareness and Action (<i>Stufenmodell gesundheitlichen Bewusstseins und Handelns</i>, Renner &amp; Hahn, 1996) that consists of six stages:</p> <ul style="list-style-type: none"> <li>- Stage 0: ‘unaware of issue’</li> <li>- Stage 1: ‘unengaged by issue’</li> <li>- Stage 2: ‘deciding about acting’</li> <li>- Stage 3a: ‘decided to act’/ Stage 3b: ‘preparation’/ Stage 3c: ‘decided not to act’</li> <li>- Stage 4: ‘acting’</li> <li>- Stage 5: ‘break off acting’</li> </ul> <p>As only participants were included who owned a mobile device, it was very unlikely that these participants did not know mhealth apps at all. Hence, we decided to drop Stage 0. As downloading an app is a simple process involving little or no costs as well as little preparatory effort and to make the model economical, we decided to drop Stages 2 and 3b. Stage 5 was renamed</p> | <p><i>If you own a smartphone or tablet:</i></p> <p>Do you think about using an app to track your fitness/ nutrition? <i>Please choose one option per column.</i></p> <p>(1) I have never thought about using an app for that. (<i>Stage 1</i>)</p> <p>(2) I have thought about using an app for that, but so far I did not do it. (<i>Stage 2</i>)</p> <p>(3) I have thought about</p> |

| Measure used in the<br>current study                                                                            | Original measure                                                  | Adaptation                                                                                                                                                                                                                                                                                                                          | Items (translated)                                                                                                                                                                                                                                                                                 |
|-----------------------------------------------------------------------------------------------------------------|-------------------------------------------------------------------|-------------------------------------------------------------------------------------------------------------------------------------------------------------------------------------------------------------------------------------------------------------------------------------------------------------------------------------|----------------------------------------------------------------------------------------------------------------------------------------------------------------------------------------------------------------------------------------------------------------------------------------------------|
|                                                                                                                 |                                                                   | ‘disengaged’ to take on common terminology in accordance with the literature on engagement with smartphone apps.                                                                                                                                                                                                                    | using an app for that,<br>but it is not necessary<br>for me to do it. ( <i>Stage</i><br>3)<br>(4) I am currently using an<br>app for that and intend<br>to continue to use it.<br><br>( <i>Stage 4</i> )<br>(5) I have used an app for<br>that, but I do not use it<br>anymore. ( <i>Stage 5</i> ) |
| Preference for Intuition<br>and Deliberation in<br>Eating decision-making<br>(E-PID; König et al., in<br>prep.) | Preference for<br>Intuition and<br>Deliberation<br>(Betsch, 2004) | The original measure consists of 19 items that measure a general preference for intuition and deliberation when making decisions.<br><br>As Parchur & Spaar (2015) noted, these preferences may differ between domains. Therefore, we developed an concise measure for eating-related decision making preferences by rephrasing the | (1) When deciding what to<br>eat, I rely on my gut<br>feeling. <sup>a</sup><br>(2) With most eating<br>decisions, it makes<br>sense to completely                                                                                                                                                  |

| Measure used in the<br>current study | Original measure | Adaptation                                                                                                                                                                                                                                           | Items (translated)                                                                                                                                                                                                                                                                                                                                                                                                                                                                                              |
|--------------------------------------|------------------|------------------------------------------------------------------------------------------------------------------------------------------------------------------------------------------------------------------------------------------------------|-----------------------------------------------------------------------------------------------------------------------------------------------------------------------------------------------------------------------------------------------------------------------------------------------------------------------------------------------------------------------------------------------------------------------------------------------------------------------------------------------------------------|
|                                      |                  | seven items that were directly transferable to eating-related decisions. For the E-PI subscale, these were items no. 4, 12 and 18 from the original questionnaire. For the E-PD subscale, items no. 1, 5, 7 and 16 were adapted (c.f. Betsch, 2004). | <p>rely on your feelings.<sup>a</sup></p> <p>(3) I am an intuitive eater.<sup>a</sup></p> <p>(4) Before I make eating decisions, I usually think about it.<sup>b</sup></p> <p>(5) I think more about my plans and goals relating to my eating behavior than other people.<sup>b</sup></p> <p>(6) I prefer making plans about my eating behavior instead of leaving it to chance.<sup>b</sup></p> <p>(7) I reflect on my eating behavior.<sup>b</sup></p> <p>Scale: (1) I do not agree to</p> <p>(5) I agree</p> |

*Note.* <sup>a</sup> E-PI, <sup>b</sup> E-PD

## References

- Betsch C. Präferenz für intuition und deliberation (PID). *Zeitschrift für Differentielle und Diagnostische Psychologie*. 2004;25(4):179-197. DOI: 10.1024/0170-1789.25.4.179
- König LM, Sproesser G, Schupp HT, Renner B. Preference for Intuition and Deliberation in Eating Decision-making: Scale validation and association with health. Manuscript in preparation.
- Pachur T, Spaar M. Domain-specific preferences for intuition and deliberation in decision making. *Journal of Applied Research in Memory and Cognition*. 2015;4(3):303-311. DOI: 10.1016/j.jarmac.2015.07.006
- Renner B, Hahn A. Prozeßmodelle zum Gesundheitsverhalten [Process models of health behavior]. In: Renner B, Hahn A, Schwarzer R, eds. *Risiko und Gesundheitsverhalten: Deokumentation der Meßinstrumente des Forschungsprojekts "Berlin Risk Appraisal and Health Motivation Study" (BRAHMS)*. Berlin: Freie Universität Berlin; 1996.
- Weinstein ND, Sandman PM. A model of the precaution adoption process: evidence from home radon testing. *Health Psychology*. 1992;11(3):170-180. DOI: 10.1037/0278-6133.11.3.170
